# Supplementary material for: Diversity patterns of free-living nematode assemblages in seagrass beds from the Cuban archipelago (Caribbean Sea)
Source: Biodivers Data J. 2020 Dec 23;8:e58848. doi: 10.3897/BDJ.8.e58848 (PMC7773714; doi:10.3897/BDJ.8.e58848)
Supplement: Supplementary material 1 — Classification of nematode species into c-p scale and trophic groups [file bdj-08-e58848-s001.xlsx]

## Sheet: Hoja1
Species	c-p value	trophic group
Acanthonchus rostratus	3	2A
Acanthopharynx rigida	3	2A
Acanthopharynx sp.	3	2A
Acanthopharynx viviparus	3	2A
Actinonema pachydermatum	3	2A
Actinonema sp.	3	2A
Adoncholaimus sp.	4	2B
Aegialoalaimus sp.	4	1A
Anticoma sp.	2	1B
Anticoma trichura	2	1B
Bathyeurystomina sp.	4	2B
Bolbonema brevicolle	3	2A
Catanema dambayensis	3	1A
Cephalanticoma chitwoodi	2	2A
Ceramonema reticulatum	3	1A
Ceramonema sp.	3	1A
Chaetonema sp.	3	2B
Cheironchus sp.	3	2B
Cheironchus vorax	3	2B
Chromadorella filiformis	3	2A
Chromadorella sp.	3	2A
Chromadorita sp.	3	2A
Chromaspirina sp.	3	2A
Cobbia sp.	3	2A
Comesoma arenae	2	2A
Comesoma sp.	2	2A
Coninckia sp.	2	1A
Crenopharynx marioni	4	1A
Crenopharynx paralepturus	4	1A
Crenopharynx sp.	4	1A
Croconema cinctum	2	2A
Cylicolaimus magnus	5	2B
Dagda bipapillata	3	2B
Daptonema longicaudatum	2	1B
Daptonema oxycerca	2	1B
Daptonema sp.	2	1B
Demonema rapax	3	2B
Demonema sp.	3	2B
Desmodora pilosa	2	2A
Desmodora pontica	2	2A
Desmodora scaldensis	2	2A
Desmodora sp.	2	2A
Desmoscolex spp.	4	1A
Dichromadora apapillata	2	2A
Dichromadora sp.	2	2A
Didelta maculatum	2	1B
Didelta scutatum	2	1B
Didelta scutellatum	2	1B
Didelta sp.	2	1B
Disconema longicaudatum	2	1B
Dolicholaimus sp.	2	2A
Dorylaimopsis punctata	2	2B
Dorylaimopsis sp.	2	2B
Draconema sp.	4	1A
Elzalia floresi	2	1B
Elzalia sp.	2	1B
Endeolophos minutus	3	2A
Enoploides sp.	2	2B
Enoplolaimus mus	2	2B
Enoplolaimus sp.	2	2B
Enoplus sp.	5	2B
Epacanthion georgei	2	2B
Epsilonema spp.	4	1A
Eubostrichus hopperi	3	1A
Eubostrichus sp.	3	1A
Euchromadora gaulica	3	2A
Euchromadora sp.	3	2A
Euchromadora vulgaris	3	2A
Eurystomina sp.	4	2B
Filoncholaimus prolatus	4	2B
Gomphionema typicum	3	2A
Graphonema sp.	3	2A
Halalaimus bulbocaudatus	4	1A
Halalaimus filicollis	4	1A
Halichoanolaimus chordiurus	3	2B
Halichoanolaimus dolichurus	3	2B
Halichoanolaimus duodecimpapillatus	3	2B
Halichoanolaimus quattuordecimpapillatus	3	2B
Halichoanolaimus sp.	3	2B
Haliplectus sp.	3	1A
Hopperia sp.	2	2B
Hypodontolaimus sp.	4	2B
Intasia nojii
Laimella longicauda	2	1B
Latronema sp.	3	2B
Laxus cosmopolitus	3	1A
Laxus parvum	3	1A
Laxus sp.	3	1A
Leptolaimus vinnulus	2	1B
Leptonemella brevipharynx	3	1A
Leptosomatum sp.	5	1A
Linhomoeus elongatus	2	1B
Linhomoeus sp.	2	1B
Linhystera problematica	2	1A
Longicyatholaimus egregius	3	2A
Longicyatholaimus sp.	3	2A
Lyranema sp.	4	2B
Marylynnia annae	3	2A
Marylynnia eratos	3	2A
Marylynnia sp.	3	2A
Mesacanthion sp.	3	2B
Metachromadora pulvinata	2	2A
Metachromadora sp.	2	2A
Metacomesoma sp.	2	1B
Metacyatholaimus chabaudi	2	2A
Metacyatholaimus effilatus	2	2A
Metadasynemella sp.	3	1A
Metadesmolaimus sp.	2	1B
Metalinhomoeus biformis	2	1B
Metalinhomoeus effilatus	2	1B
Metalinhomoeus sp.	2	1B
Metalinhomoeus variabilis	2	1B
Micoletzkyia magna	4	1A
Microlaimus sp.	3	2A
Monoposthia mirabilis	3	2A
Neochromadora nicolae	2	2A
Odontophora bermudensis	2	2B
Odontophora sp.	2	2B
Oxyonchus sp.	2	2B
Oxystomina sp.	4	1A
Paracanthonchus longicaudatus	2	2A
Paracomesoma dubium	2	2A
Paracomesoma sp.	2	2A
Paradesmodora immersa	2	2A
Paradesmodora sinuosa	2	2A
Paradesmodora sp.	2	2A
Paralongicyatholaimus sp.	3	2A
Paramesacanthion sp.	2	2B
Paramesonchium sp.	2	2B
Paramonohystera proteus	2	1B
Paramonohystera sp.	2	1B
Paranticoma sp.	2	1B
Pareurystomina sp.	4	2B
Parodontophora cobbi	2	2B
Parodontophora sp.	2	2B
Paroxystomina micoletzkyi	4	1A
Paroxystomina sp.	4	1A
Perspiria hamata	3	2A
Perspiria sp.	3	2A
Phanoderma laticolle	4	2A
Phanoderma sp.	4	2A
Phanodermella flagellicaudata	4	2A
Phanodermopsis longisetae	4	1A
Phanodermopsis sp.	4	1A
Pierrickia sp.	2	1A
Platycoma sp.	3	1A
Platycomopsis sp.	3	1A
Polygastrophora maior	4	2B
Polygastrophora sp.	4	2B
Pomponema clavicaudatum	4	2A
Pomponema concinnum	4	2A
Pomponema sp.	4	2A
Pontonema problematicum	4	2B
Prochromadorella ditlevseni	3	2A
Promonhystera faber	2	1B
Promonhystera sp.	2	1B
Pselionema simile	3	1A
Pselionema sp.	3	1A
Pseudosteineria sp.	2	1B
Ptycholaimellus sp.	3	2A
Rhinema retrorsum	3	2A
Rhinema sp.	3	2A
Rhips anoxybiotica	3	2A
Rhips paraornata	3	2A
Rhips sp.	3	2A
Richtersia coomansi	3	1B
Robbea porosum	3	1A
Robbea sp.	3	1A
Sabatieria armata	2	1B
Sabatieria sp.	2	1B
Scaptrella cincta	2	2B
Setoplectus sp.	3	1A
Setosabatieria hilarula	2	1B
Setosabatieria sp.	2	1B
Siphonolaimus sp.	3	1A
Sphaerolaimus maeoticus	3	2B
Sphaerolaimus sp.	3	2B
Spiliphera sp.	3	2A
Spilophorella candida	2	2A
Spilophorella paradoxa	2	2A
Spilophorella sp.	2	2A
Spirinia parasitifera	3	2A
Spirinia sp.	3	2A
Spirobolbolaimus bathyalis	3	2A
Steineria sterreri	2	1B
Stilbonema brevicolle	3	1A
Stilbonema sp.	3	1A
Symplocostoma tenuicolle	4	2B
Synodontium sp.	2	2B
Synonchiella micramphis	3	2B
Synonchiella riemanni	3	2B
Synonchiella sp.	3	2B
Synonchium sp.	3	2B
Synonchus sp.	5	2A
Syringolaimus filicaudatus	4	2B
Syringolaimus striatocaudatus	4	2B
Tarvaia sp.	3	1B
Terschellingia gourbaultae	3	1A
Terschellingia longicaudata	3	1A
Terschellingia sp.	3	1A
Thalassironus britannicus	4	2B
Thalassironus sp.	4	2B
Theristus otoplanobius	2	1B
Theristus sp.	2	1B
Tricoma spp.	4	1A
Trileptium otti	2	2B
Trissonchulus janetae	4	2B
Trochamus carinatus	3	2A
Viscosia abyssorum	3	2B
Viscosia glabra	3	2B
Viscosia sp.	3	2B
Xennella sp.	3	1A
Xyala sp.	2	2A
Zalonema ditlevseni	3	2A
Zalonema sp.	3	2A
